# Supplementary material
Source: Springer Nature journal article supplement (https://www.springermedizin.de/resource/supplementary/13075_2009_2736_MOESM1_ESM.pdf/9692768)

**A**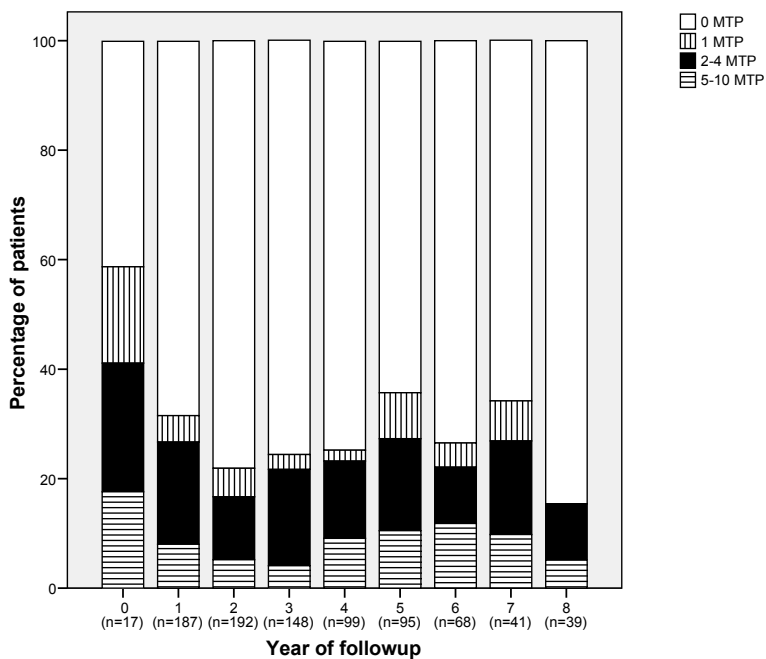**B**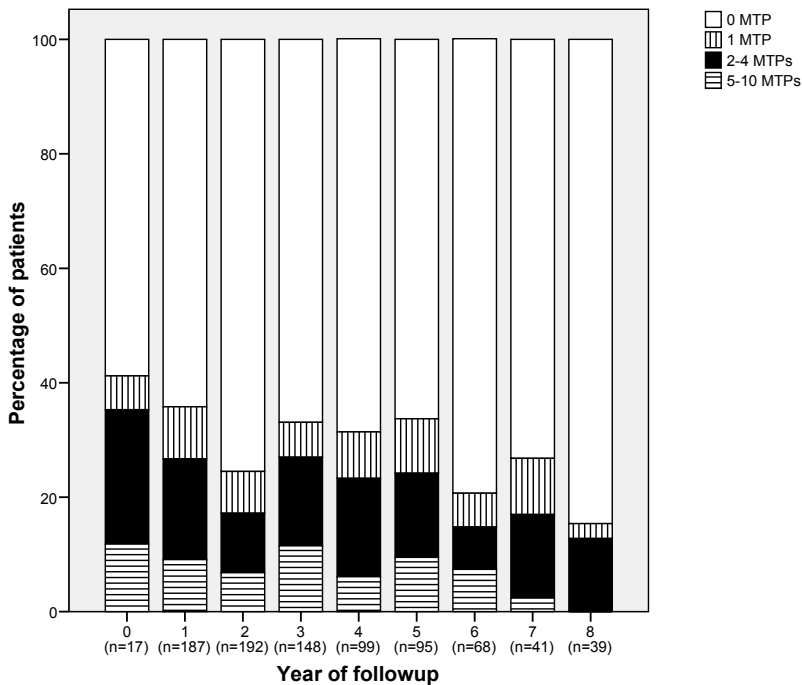

Supplement: MOESM1 [file 9692768]
